# Supplementary material
Source: HighWire-hosted journal article supplement (http://www.qdcxjkg.com/highwire/filestream/113654/field_highwire_adjunct_files/0/Annex_II.pdf)
Supplement: Annex_II.pdf [file Annex_II.pdf]

## Annexe II: Audit tool for the evaluation of TB management in an in-patient setting

| Activity to be audited                     | Reference Standard                                                                                                                                                                                                                                                                                                                                        | Reference                                                                                       |
|--------------------------------------------|-----------------------------------------------------------------------------------------------------------------------------------------------------------------------------------------------------------------------------------------------------------------------------------------------------------------------------------------------------------|-------------------------------------------------------------------------------------------------|
| <b>Investigation previous TB diagnosis</b> | Complete information on previous diagnosis (including SS, C, DST), previous treatment regimens, and outcomes (including SS and C conversion and final outcome- Laserson's criteria)                                                                                                                                                                       | ISTC document; WHO guidelines, Systematic review (G. Sotgiu, ERJ 2009); Laserson K, IJTLD, 2005 |
| <b>Investigation previous DST</b>          | Complete information on drugs tested, methodology used, resistance identified, EQA standards if the laboratory performing DST                                                                                                                                                                                                                             | ISTC document; WHO guidelines                                                                   |
| <b>Investigation previous treatment</b>    | Complete information on regimens prescribed, dosage, duration, interruptions                                                                                                                                                                                                                                                                              | ISTC document; WHO guidelines                                                                   |
| <b>Investigation contacts</b>              | Information on the index case drug resistance profile                                                                                                                                                                                                                                                                                                     | ISTC document; WHO guidelines                                                                   |
| <b>Diagnostic algorithm</b>                | <p>Complete set of bacteriological examinations, chest radiography, other examinations to obtain biological samples, better imaging, or diagnosis of infection.</p> <p>In cases in which DR is suspected: HIV tested, SS; rapid resistance test (Hein test), then correct MDR-TB management</p> <p>See ISTC Standards for diagnosis and ISTC Table 10</p> | ISTC document; WHO guidelines                                                                   |
| <b>Microbiology</b>                        | <p>SS, C, DST requested and performed; rapid test done; DST for all classes of 2nd line drugs, methodology used, resistance identified, EQA standards if the laboratory performing DST</p> <p>See Table 5.1 WHO guidelines;</p> <p>See ISTC Standards for diagnosis</p>                                                                                   | ISTC document; WHO guidelines                                                                   |
| <b>Other examinations</b>                  | <p>Examinations justified by information available and missing, in agreement with national guidelines</p> <p>See ISTC Standards for diagnosis</p>                                                                                                                                                                                                         | ISTC document; WHO guidelines                                                                   |
| <b>Final decision</b>                      | <p>Microbiological confirmation (culture) and DST; rapid test when MDR is suspected (waiting for DST)</p> <p>See ISTC Standards for diagnosis</p>                                                                                                                                                                                                         | ISTC document; WHO guidelines                                                                   |

|                                                                |                                                                                                                                                                                                                                                                                                                                              |                                              |
|----------------------------------------------------------------|----------------------------------------------------------------------------------------------------------------------------------------------------------------------------------------------------------------------------------------------------------------------------------------------------------------------------------------------|----------------------------------------------|
|                                                                |                                                                                                                                                                                                                                                                                                                                              |                                              |
| <b>TB regimen choice</b>                                       | At least 4 drugs (up to 5-7) with known susceptibility ensured; hierarchy based on 5 classes of anti-TB drugs; eliminate drugs for which cross-resistance is likely and those not safe for the patient; ciprofloxacin no more used; nutritional and social support;<br><br>See Table 7.1, 7.2, 7.4, 8.1;<br>See ISTC Standards for Treatment | ISTC document; WHO guidelines                |
| <b>Dosage</b>                                                  | See Annex 1, 2, Table 9.2 WHO Guidelines<br>See ISTC Standards for Treatment                                                                                                                                                                                                                                                                 | ISTC document; WHO guidelines                |
| <b>Duration</b>                                                | 18 months past culture conversion<br>See ISTC Standards for Treatment                                                                                                                                                                                                                                                                        | ISTC document; WHO guidelines                |
| <b>Management adverse events TB treatment</b>                  | See Chapter 11, Table 11.1, 11.2, 11.3; 11.4, WHO guidelines                                                                                                                                                                                                                                                                                 | ISTC document; WHO guidelines                |
| <b>HIV regimen choice</b>                                      | See Chapter 10 WHO guidelines<br>See ISTC Standards for Treatment                                                                                                                                                                                                                                                                            | ISTC document; WHO guidelines                |
| <b>Management adverse events HIV treatment</b>                 | See Chapter 10 WHO guidelines                                                                                                                                                                                                                                                                                                                | ISTC document; WHO guidelines                |
|                                                                |                                                                                                                                                                                                                                                                                                                                              |                                              |
| <b>Necessary examinations performed</b>                        | All previous steps correctly managed                                                                                                                                                                                                                                                                                                         | ISTC document; WHO guidelines                |
|                                                                |                                                                                                                                                                                                                                                                                                                                              |                                              |
| <b>Correct outcome assigned</b>                                | Laserson's criteria; See Chapter 18 WHO guidelines                                                                                                                                                                                                                                                                                           | ISTC document; WHO guidelines                |
|                                                                |                                                                                                                                                                                                                                                                                                                                              |                                              |
| <b>Administrative measures adequate</b>                        | See Chapter 15 WHO Guidelines and WHO IC Policy document; introduction ISTC V2 and Standard 20 ISTC                                                                                                                                                                                                                                          | ISTC document; WHO guidelines; WHO IC policy |
| <b>Environmental measures adequate</b>                         | See Chapter 15 WHO Guidelines and WHO IC Policy document; introduction ISTC V2 and Standard 20 ISTC                                                                                                                                                                                                                                          | ISTC document; WHO guidelines; WHO IC policy |
| <b>Infection control committee</b>                             | See Chapter 15 WHO Guidelines and WHO IC Policy document; introduction ISTC V2 and Standard 20 ISTC                                                                                                                                                                                                                                          | ISTC document; WHO guidelines; WHO IC policy |
| <b>Surveillance system</b>                                     | See Chapter 18 WHO Guidelines and WHO IC Policy document; introduction ISTC V2 and Standard 21 ISTC                                                                                                                                                                                                                                          | ISTC document; WHO guidelines; WHO IC policy |
| <b>Staff personal protective respiratory measures adequate</b> | See Chapter 15 WHO Guidelines and WHO IC Policy document; introduction ISTC V2 and Standard 20 ISTC                                                                                                                                                                                                                                          | ISTC document; WHO guidelines; WHO IC policy |
| <b>Cough etiquette</b>                                         | See Chapter 15 WHO Guidelines and WHO IC Policy document;                                                                                                                                                                                                                                                                                    | ISTC document; WHO guidelines; WHO IC policy |

|                                                       |                                                                                                              |                                                 |
|-------------------------------------------------------|--------------------------------------------------------------------------------------------------------------|-------------------------------------------------|
|                                                       | introduction ISTC V2 and Standard 20<br>ISTC                                                                 |                                                 |
| <b>Availability of respirators</b>                    | See Chapter 15 WHO Guidelines and<br>WHO IC Policy document;<br>introduction ISTC V2 and Standard 20<br>ISTC | ISTC document; WHO<br>guidelines; WHO IC policy |
| <b>Training of the staff on infection<br/>control</b> | See Chapter 15 WHO Guidelines and<br>WHO IC Policy document;<br>introduction ISTC V2 and Standard 20<br>ISTC | ISTC document; WHO<br>guidelines; WHO IC policy |
